# Supplementary figures and images for: Transcytosis and trans-synaptic retention by postsynaptic ErbB4 underlie axonal accumulation of NRG3
Source: PubMed Central journal article supplement — J Cell Biol. 2022 May 17;221(7):e202110167. doi: 10.1083/jcb.202110167 (PMC9118086; doi:10.1083/jcb.202110167), 2022-05-17

### Source Data for Figure 3C

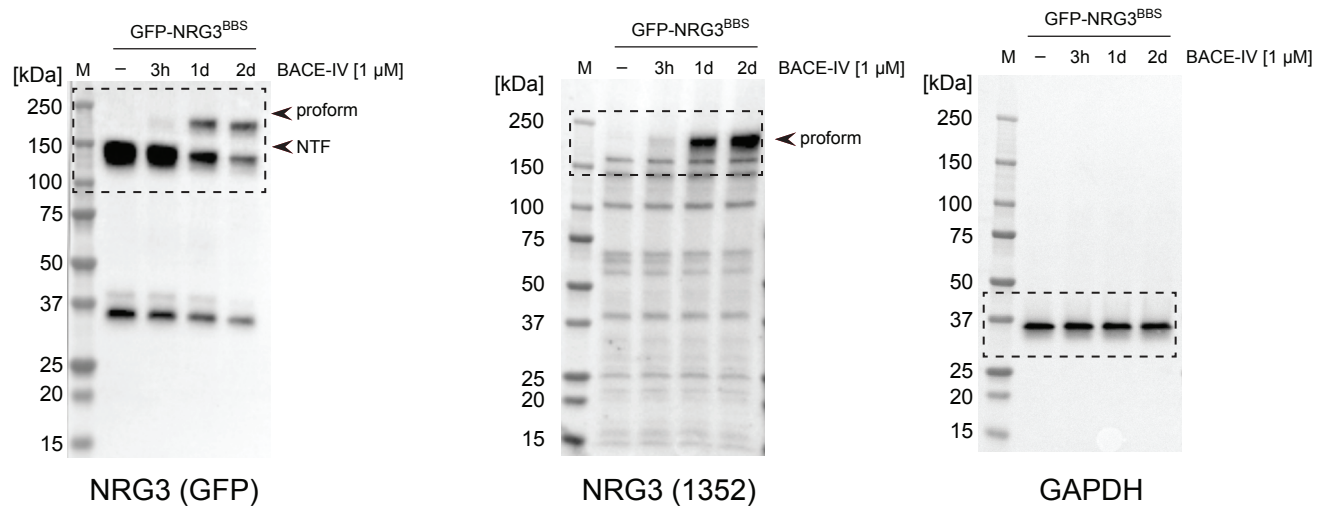

Supplement: JCB_202110167_SourceDataF3.pdf [file JCB_202110167_SourceDataF3.pdf]

### Source Data for Figure 7C

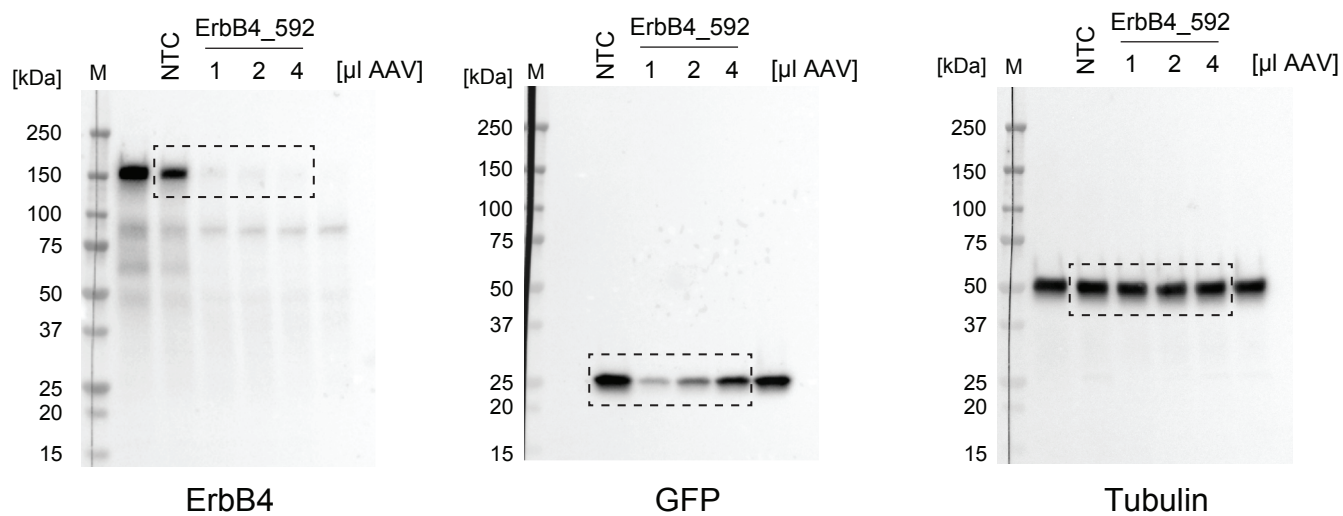

Supplement: JCB_202110167_SourceDataF7.pdf [file JCB_202110167_SourceDataF7.pdf]

### Source Data for Figure S2A

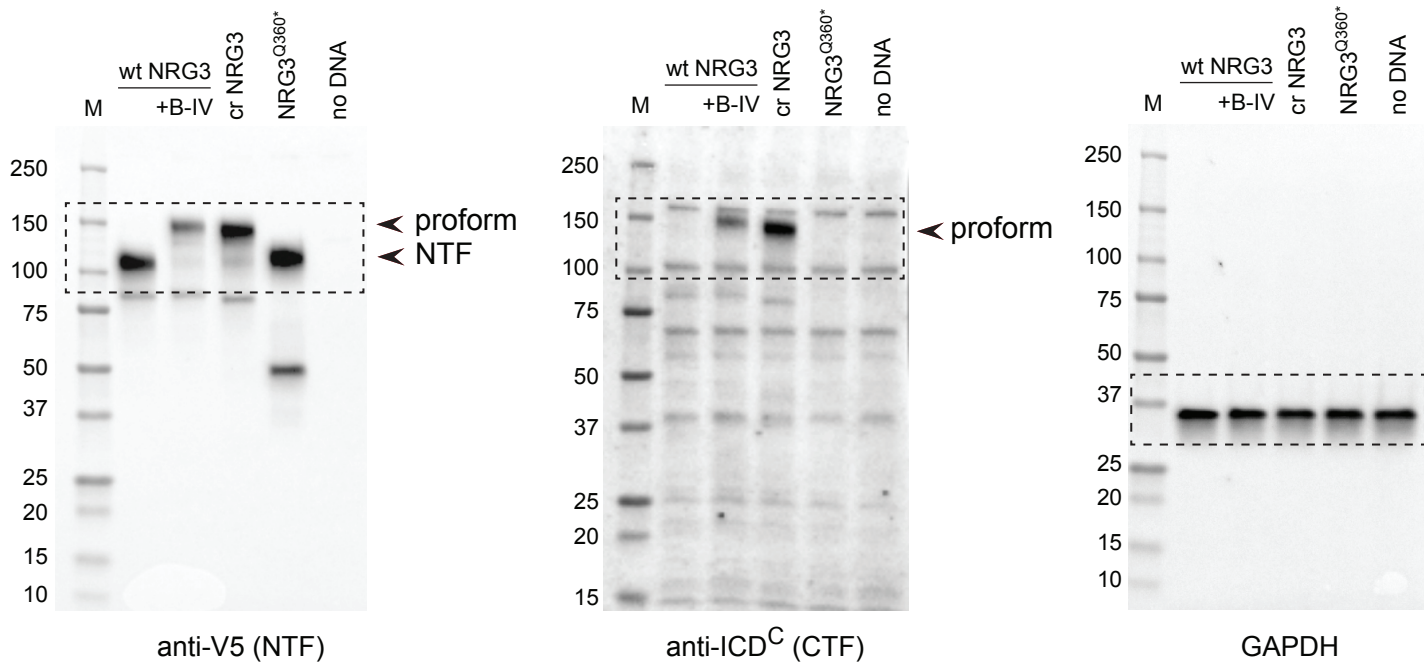

Supplement: JCB_202110167_SourceDataFS2.pdf [file JCB_202110167_SourceDataFS2.pdf]

## Source Data for Figure S4B

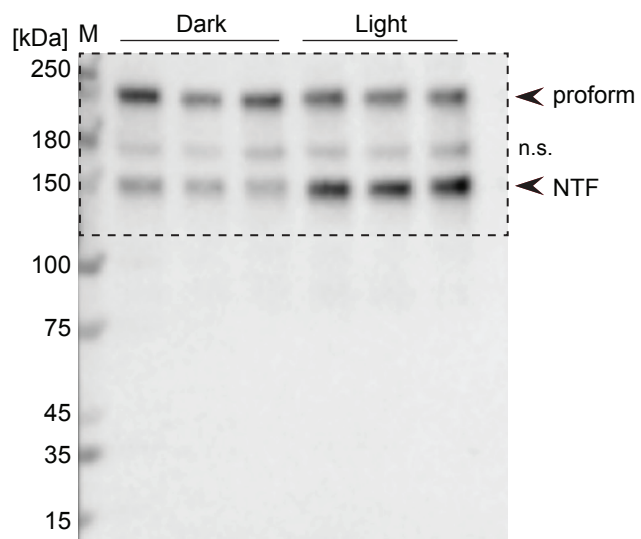

Supplement: JCB_202110167_SourceDataFS4.pdf [file JCB_202110167_SourceDataFS4.pdf]
